# Supplementary material for: Microscopic Properties of Na and Li—A First Principle Study of Metal Battery Anode Materials
Source: PubMed Central journal article supplement — ChemSusChem. 2020 Jan 21;13(4):771–83. doi: 10.1002/cssc.201902860 (PMC7065241; doi:10.1002/cssc.201902860), 2020-01-21
Supplement: CSSC-13-771-s001.pdf [file CSSC-13-771-s001.pdf]

## Supporting Information

### **Microscopic Properties of Na and Li—A First Principle Study of Metal Battery Anode Materials**

Daniel Gaissmaier,<sup>[a, c, d]</sup> Matthias van den Borg,<sup>[a]</sup> Donato Fantauzzi,<sup>[b, c, d]</sup> and  
Timo Jacob<sup>\*[a, c, d]</sup>

csc\_201902860\_sm\_miscellaneous\_information.pdf

# SUPPORTING INFORMATION

## Table of contents

|                                                                       |    |         |
|-----------------------------------------------------------------------|----|---------|
| I. bulk properties.....                                               | 2  | Gelösch |
| II. Diffusion properties.....                                         | 3  | Gelösch |
| A. Terrace self-diffusion on the low-index surfaces of Na and Li..... | 3  | Gelösch |
| B. Diffusion properties on Na(100) and Li(100).....                   | 5  | Gelösch |
| Terrace.....                                                          | 8  | Gelösch |
| Step-edge.....                                                        | 9  | Gelösch |
| Step-vacancy.....                                                     | 10 | Gelösch |
| Kink.....                                                             | 11 | Gelösch |
| Inner-corner.....                                                     | 12 | Gelösch |
| Outer-corner.....                                                     | 13 | Gelösch |
| Dimer.....                                                            | 14 | Gelösch |
| Concerted dimer.....                                                  | 15 | Gelösch |
| Trimer (linear).....                                                  | 16 | Gelösch |
| Trimer (linear).....                                                  | 17 | Gelösch |
| Ehrlich-Schwoebel-barrier.....                                        | 18 | Gelösch |
| Ehrlich-Schwoebel-barrier (dimer).....                                | 19 | Gelösch |
| Upper step.....                                                       | 20 | Gelösch |
| C. Diffusion properties on Na(110).....                               | 21 | Gelösch |

## I. BULK PROPERTIES

**Table 1.** Calculated (PBE, BEEF-vdW) and experimental (Expt.) physical constants for the various bulk phases of sodium and lithium. Lattice constant  $a_0$  and  $c_0$  are given in Å, cohesive energies  $E_{\text{coh}}$  are given in eV/atom, and bulk moduli  $B_0$  are given in GPa. All experimental results were taken from Ref. 1. For BEEF-vdW the calculated standard deviation of the cohesive energy is given in parentheses. For the experimental data of  $a_0$ ,  $E_{\text{coh}}$  and  $B_0$  the values of  $\Delta a_0/a_0$ ,  $E_{\text{ZPVE}}$  and  $\Delta B_0/B_0$  are given in parentheses, respectively.

|     |                  | Sodium |              |              | Lithium            |             |               |
|-----|------------------|--------|--------------|--------------|--------------------|-------------|---------------|
|     |                  | PBE    | BEEF-vdW     | Expt.        | PBE                | BEEF-vdW    | Expt.         |
| bcc | $a_0$            | 4.19   | 4.18         | 4.21 (0.02)  | 3.44 <sup>2</sup>  | 3.40        | 3.45 (0.03)   |
|     | $E_{\text{coh}}$ | 1.09   | 1.15 s(0.25) | 1.13 (0.02)  | 1.61 <sup>2</sup>  | 1.66 (0.16) | 1.67 (0.03)   |
|     | $B_0$            | 7.96   | 8.48         | 7.73 (-0.03) | 13.92 <sup>2</sup> | 15.43       | 13.90 (-0.05) |
| fcc | $a_0$            | 5.29   | 5.27         | -            | 4.33 <sup>2</sup>  | 4.28        | -             |
|     | $E_{\text{coh}}$ | 1.09   | 1.14 (0.25)  | -            | 1.61 <sup>2</sup>  | 1.66 (0.16) | -             |
|     | $B_0$            | 7.87   | 8.43         | -            | 13.86 <sup>2</sup> | 15.50       | -             |
| hcp | $a_0$            | 3.74   | 3.73         | -            | 3.06 <sup>2</sup>  | 3.03        | -             |
|     | $c_0$            | 6.11   | 6.09         | -            | 5.00 <sup>2</sup>  | 4.95        | -             |
|     | $E_{\text{coh}}$ | 1.09   | 1.14 (0.25)  | -            | 1.61 <sup>2</sup>  | 1.65 (0.16) | -             |
|     | $B_0$            | 7.91   | 8.38         | -            | 13.87 <sup>2</sup> | 15.21       | -             |
| hR9 | $a_0$            | 3.72   | 3.71         | -            | 3.07               | 3.04        | -             |
|     | $c_0$            | 27.80  | 27.71        | -            | 22.33              | 22.09       | -             |
|     | $E_{\text{coh}}$ | 1.09   | 1.14 (0.25)  | -            | 1.61               | 1.66 (0.16) | -             |
|     | $B_0$            | 7.84   | 8.43         | -            | 13.97              | 15.47       | -             |
| a15 | $a_0$            | 6.68   | 6.66         | -            | 5.46               | 5.41        | -             |
|     | $E_{\text{coh}}$ | 1.08   | 1.13 (0.25)  | -            | 1.60               | 1.64 (0.16) | -             |
|     | $B_0$            | 7.65   | 8.20         | -            | 13.61              | 15.16       | -             |
| dia | $a_0$            | 7.59   | 7.79         | -            | 5.91 <sup>2</sup>  | 5.80        | -             |
|     | $E_{\text{coh}}$ | 0.75   | 0.81 (0.25)  | -            | 1.09 <sup>2</sup>  | 1.13 (0.16) | -             |
|     | $B_0$            | 2.81   | 2.03         | -            | 5.30 <sup>2</sup>  | 6.00        | -             |
| sc  | $a_0$            | 3.41   | 3.40         | -            | 2.73 <sup>2</sup>  | 2.71        | -             |
|     | $E_{\text{coh}}$ | 0.97   | 1.02 (0.25)  | -            | 1.49 <sup>2</sup>  | 1.54 (0.16) | -             |
|     | $B_0$            | 6.22   | 6.39         | -            | 12.48 <sup>2</sup> | 13.38       | -             |

## II. DIFFUSION PROPERTIES

### A. Terrace self-diffusion on the low-index surfaces of Na and Li

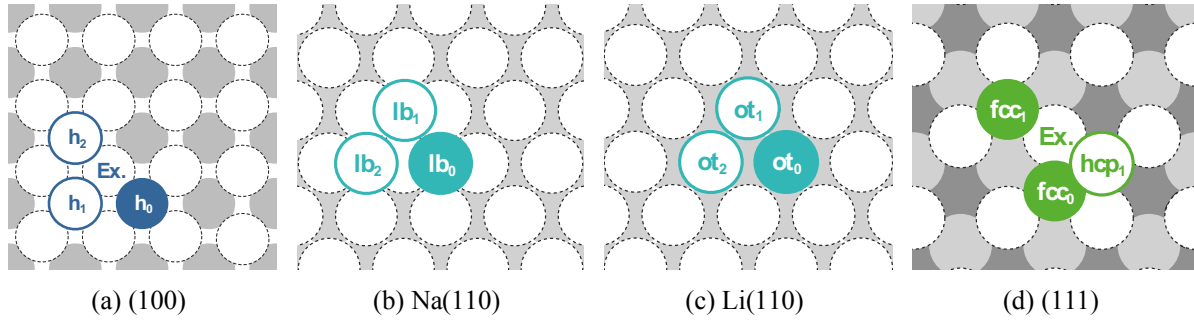

**Fig. 1:** Schematic representation of the examined self-diffusion pathways on (a) Na(100) and Li(100), (b) Na(110), (c) Li(110), and (d) Na(111) and Li(111). For the initial positions the most stable adsorption site on the respective surface was chosen, i.e. hollow (h), long-bridge (lb), ontop (ot) and fcc. Here, a filled circle marks the initial position, while a framed circle indicates possible final positions of the diffusion pathway. All circles marked with Ex symbolize atoms participating in the exchange process. The obtained activation energies and reaction rates are given in [Table II](#) and [Table III](#).

**Table II:** Calculated terrace self-diffusion barriers of sodium and lithium on its low-index surfaces. For BEEF-vdW, the calculated standard deviation of the forward (for) and reversed (rev) activation energy  $E_a$  is given in parentheses. All values are reported in eV.

|         |                                     | PBE                                 |                    | BEEF-vdW           |                    |              |
|---------|-------------------------------------|-------------------------------------|--------------------|--------------------|--------------------|--------------|
|         |                                     | $E_a^{\text{for}}$                  | $E_a^{\text{rev}}$ | $E_a^{\text{for}}$ | $E_a^{\text{rev}}$ |              |
| Sodium  | (100)                               | $h_0 \leftrightarrow h_1$           | 0.09               | 0.09               | 0.11 (0.03)        | 0.11 (0.03)  |
|         |                                     | $h_0 \leftrightarrow h_2$           | 0.31               | 0.31               | 0.31 (0.09)        | 0.31 (0.09)  |
|         |                                     | $h_0 \leftrightarrow h_2$ (Ex.)     | 0.06               | 0.06               | 0.06 (0.03)        | 0.06 (0.03)  |
|         | (110)                               | $lb_0 \leftrightarrow lb_1$         | 0.04               | 0.04               | 0.04 (0.07)        | 0.04 (0.07)  |
|         |                                     | $lb_0 \leftrightarrow lb_2$         | 0.03               | 0.03               | 0.05 (0.04)        | 0.05 (0.04)  |
|         | (111)                               | $fcc_0 \leftrightarrow fcc_1$ (Ex.) | 0.09               | 0.09               | 0.08 (0.04)        | 0.08 (0.04)  |
|         |                                     | $fcc_0 \leftrightarrow hcp_1$       | 0.27               | 0.00               | 0.25 (0.04)        | 0.01 (0.02)  |
|         | $fcc_1 \leftrightarrow hcp_1$ (Ex.) | 0.29                                | 0.03               | 0.29 (0.05)        | 0.05 (0.05)        |              |
| Lithium | (100)                               | $h_0 \leftrightarrow h_1$           | 0.04               | 0.04               | 0.05 (0.04)        | 0.05 (0.04)  |
|         |                                     | $h_0 \leftrightarrow h_2$           | 0.20               | 0.20               | 0.21 (0.07)        | 0.21 (0.07)  |
|         |                                     | $h_0 \leftrightarrow h_2$ (Ex.)     | 0.11               | 0.11               | 0.11 (0.03)        | 0.11 (0.03)  |
|         | (110)                               | $ot_0 \leftrightarrow ot_1$         | 0.05               | 0.05               | 0.05 (0.03)        | 0.05 (0.03)  |
|         |                                     | $ot_0 \leftrightarrow ot_2$         | 0.05               | 0.05               | 0.05 (0.02)        | 0.05 (0.02)  |
|         | (111)                               | $fcc_0 \leftrightarrow fcc_1$ (Ex.) | 0.13               | 0.13               | 0.12 (0.02)        | 0.12 (0.02)  |
|         |                                     | $fcc_0 \leftrightarrow hcp_1$       | 0.39               | 0.00               | 0.40 (0.07)        | 0.00 (-----) |
|         | $fcc_1 \leftrightarrow hcp_1$ (Ex.) | 0.39                                | 0.00               | 0.40 (0.07)        | 0.00 (-----)       |              |

**Table III:** Calculated forward (for) and reversed (rev) room-temperature reaction rates ( $k_{@RT}$ ) of sodium and lithium on its low-index surfaces. The DFT-PBE values for Li(100) have been adapted from Ref 2. For all further values, we assumed a pre-exponential factor of  $\nu = 5 \cdot 10^{12}$  Hz. All values are reported in Hz and have been obtained by means of DFT-PBE.

|         |       | PBE                                 |                     | BEEF-vdW            |                     |                     |
|---------|-------|-------------------------------------|---------------------|---------------------|---------------------|---------------------|
|         |       | $k_{@RT}^{for}$                     | $k_{@RT}^{rev}$     | $k_{@RT}^{for}$     | $k_{@RT}^{rev}$     |                     |
| Sodium  |       | $h_0 \leftrightarrow h_1$           | $1.5 \cdot 10^{11}$ | $1.5 \cdot 10^{11}$ | $6.9 \cdot 10^{10}$ | $6.9 \cdot 10^{10}$ |
|         | (100) | $h_0 \leftrightarrow h_2$           | $2.9 \cdot 10^{07}$ | $2.9 \cdot 10^{07}$ | $2.9 \cdot 10^{07}$ | $2.9 \cdot 10^{07}$ |
|         |       | $h_0 \leftrightarrow h_2$ (Ex.)     | $4.8 \cdot 10^{11}$ | $4.8 \cdot 10^{11}$ | $4.8 \cdot 10^{11}$ | $4.8 \cdot 10^{11}$ |
|         | (110) | $lb_0 \leftrightarrow lb_1$         | $1.1 \cdot 10^{12}$ | $1.1 \cdot 10^{12}$ | $1.1 \cdot 10^{12}$ | $1.1 \cdot 10^{12}$ |
|         |       | $lb_0 \leftrightarrow lb_2$         | $1.6 \cdot 10^{12}$ | $1.6 \cdot 10^{12}$ | $7.1 \cdot 10^{11}$ | $7.1 \cdot 10^{11}$ |
|         |       | $fcc_0 \leftrightarrow fcc_1$ (Ex.) | $1.5 \cdot 10^{11}$ | $1.5 \cdot 10^{11}$ | $2.2 \cdot 10^{11}$ | $2.2 \cdot 10^{11}$ |
|         | (111) | $fcc_0 \leftrightarrow hcp_1$       | $1.4 \cdot 10^{08}$ | ---                 | $3.0 \cdot 10^{08}$ | $3.4 \cdot 10^{12}$ |
|         |       | $fcc_1 \leftrightarrow hcp_1$ (Ex.) | $6.3 \cdot 10^{07}$ | $1.6 \cdot 10^{12}$ | $6.3 \cdot 10^{07}$ | $7.1 \cdot 10^{11}$ |
| Lithium |       | $h_0 \leftrightarrow h_1$           | $6.1 \cdot 10^{11}$ | $6.1 \cdot 10^{11}$ | $7.1 \cdot 10^{11}$ | $7.1 \cdot 10^{11}$ |
|         | (100) | $h_0 \leftrightarrow h_2$           | $1.1 \cdot 10^{09}$ | $1.1 \cdot 10^{09}$ | $1.4 \cdot 10^{09}$ | $1.4 \cdot 10^{09}$ |
|         |       | $h_0 \leftrightarrow h_2$ (Ex.)     | $5.5 \cdot 10^{10}$ | $5.5 \cdot 10^{10}$ | $6.9 \cdot 10^{10}$ | $6.9 \cdot 10^{10}$ |
|         | (110) | $ot_0 \leftrightarrow ot_1$         | $7.1 \cdot 10^{11}$ | $7.1 \cdot 10^{11}$ | $7.1 \cdot 10^{11}$ | $7.1 \cdot 10^{11}$ |
|         |       | $ot_0 \leftrightarrow ot_2$         | $7.1 \cdot 10^{11}$ | $7.1 \cdot 10^{11}$ | $7.1 \cdot 10^{11}$ | $7.1 \cdot 10^{11}$ |
|         |       | $fcc_0 \leftrightarrow fcc_1$ (Ex.) | $3.2 \cdot 10^{10}$ | $3.2 \cdot 10^{10}$ | $4.7 \cdot 10^{10}$ | $4.7 \cdot 10^{10}$ |
|         | (111) | $fcc_0 \leftrightarrow hcp_1$       | $1.3 \cdot 10^{06}$ | ---                 | $8.7 \cdot 10^{05}$ | ---                 |
|         |       | $fcc_1 \leftrightarrow hcp_1$ (Ex.) | $1.3 \cdot 10^{06}$ | ---                 | $8.7 \cdot 10^{05}$ | ---                 |

## B. Diffusion properties on Na(100) and Li(100)

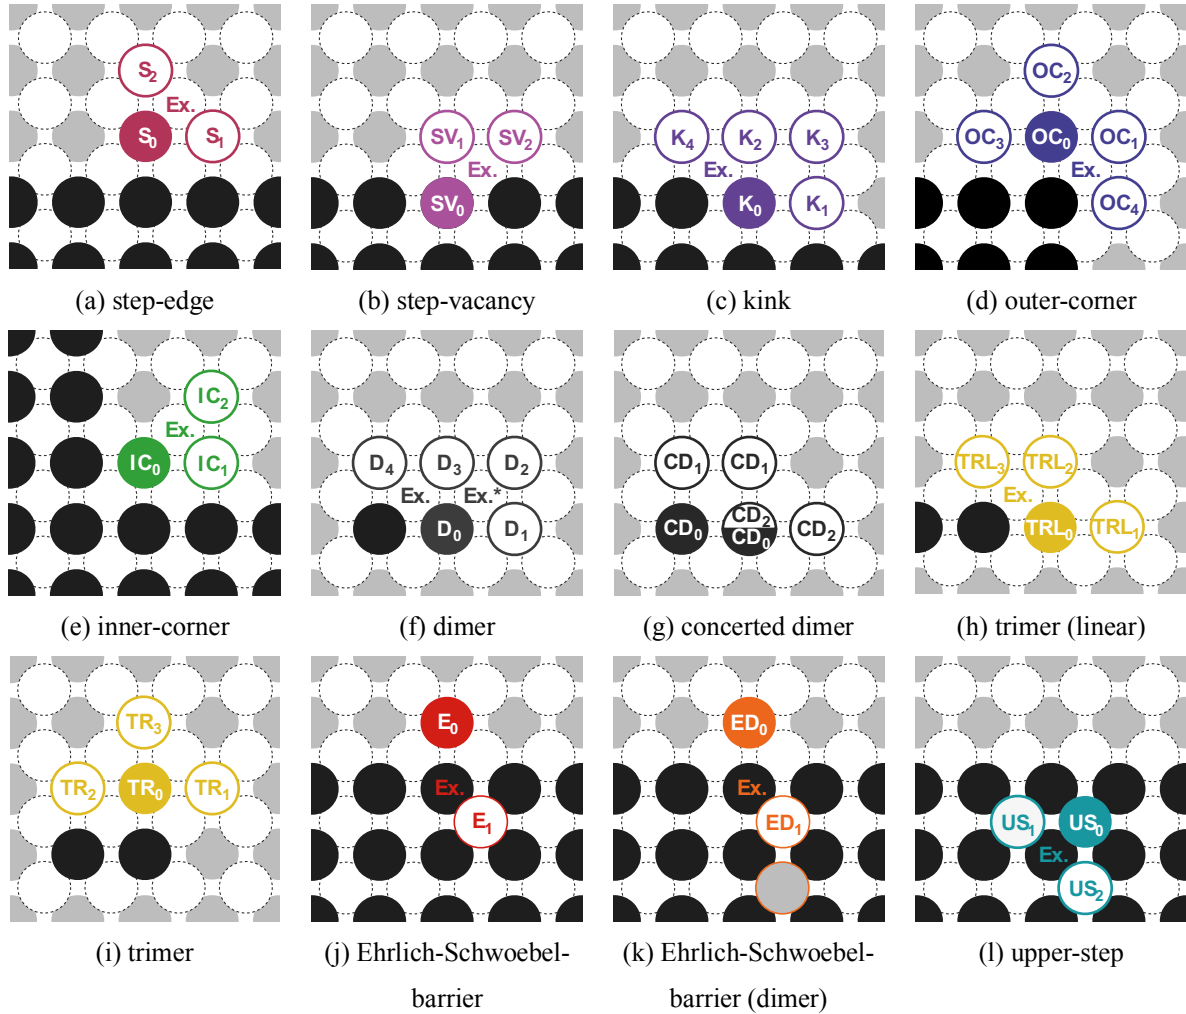

**Fig. 2:** Schematic representation of the investigated self-diffusion on Na(100). Here, a filled circle marks the initial position, while a framed circle indicates possible final positions of the diffusion pathway. Circles labeled by Ex mark atoms participating in the exchange process. For all illustrated processes, the characteristic values are listed in [Table IV](#), and [Table V](#).

Gelöscht

Gelöscht

**Table IV:** Calculated forward (for) and reversed (rev) activation energies ( $E_a$ ) for the various diffusion pathways on Na(100) and Li(100). The values for lithium have been adapted from Ref. 2. All values are reported in eV and have been calculated by means of DFT-PBE.

| System                            | Pathway                             | Na(100)            |                    | Li(100)            |                    |
|-----------------------------------|-------------------------------------|--------------------|--------------------|--------------------|--------------------|
|                                   |                                     | $E_a^{\text{for}}$ | $E_a^{\text{rev}}$ | $E_a^{\text{for}}$ | $E_a^{\text{rev}}$ |
| Step-edge                         | $S_0 \leftrightarrow S_1$           | 0.13               | 0.13               | 0.09               | 0.09               |
|                                   | $S_0 \leftrightarrow S_2$           | 0.15               | 0.05               | 0.19               | 0.01               |
|                                   | $S_1 \leftrightarrow S_2$ (Ex.)     | 0.15               | 0.06               | 0.24               | 0.06               |
| Step-vacancy                      | $SV_0 \leftrightarrow SV_1$         | 0.32               | 0.06               | 0.47               | 0.00               |
|                                   | $SV_0 \leftrightarrow SV_2$ (Ex.)   | 0.20               | 0.04               | 0.39               | 0.07               |
| Kink                              | $K_0 \leftrightarrow K_1$           | 0.21               | 0.11               | 0.20               | 0.06               |
|                                   | $K_0 \leftrightarrow K_2$           | 0.26               | 0.06               | 0.34               | 0.01               |
|                                   | $K_1 \leftrightarrow K_3$           | 0.13               | 0.05               | 0.24               | 0.04               |
|                                   | $K_0 \leftrightarrow K_4$ (Ex.)     | 0.18               | 0.08               | 0.26               | 0.09               |
| Inner-corner                      | $IC_0 \leftrightarrow IC_1$         | 0.19               | 0.10               | 0.20               | 0.05               |
|                                   | $IC_1 \leftrightarrow IC_2$         | 0.18               | 0.08               | 0.25               | 0.04               |
| Outer-corner                      | $OC_0 \leftrightarrow OC_1$         | 0.19               | 0.09               | 0.21               | 0.02               |
|                                   | $OC_0 \leftrightarrow OC_2$         | 0.17               | 0.06               | 0.19               | 0.01               |
|                                   | $OC_0 \leftrightarrow OC_3$         | 0.13               | 0.12               | 0.06               | 0.07               |
|                                   | $OC_0 \leftrightarrow OC_4$ (Ex.)   | 0.04               | 0.04               | 0.11               | 0.12               |
| Dimer                             | $D_0 \leftrightarrow D_1$           | 0.21               | 0.07               | 0.21               | 0.01               |
|                                   | $D_0 \leftrightarrow D_2$ (Ex. *)   | 0.20               | 0.06               | 0.26               | 0.06               |
|                                   | $D_0 \leftrightarrow D_3$           | 0.18               | 0.04               | 0.14               | 0.00               |
|                                   | $D_0 \leftrightarrow D_4$ (Ex.)     | 0.05               | 0.05               | 0.08               | 0.08               |
| Concerted dimer                   | $CD_0 \leftrightarrow CD_1$         | 0.29               | 0.29               | 0.14               | 0.14               |
|                                   | $CD_0 \leftrightarrow CD_2$         | 0.24               | 0.24               | 0.21               | 0.21               |
| Trimer                            | $TRL_0 \leftrightarrow TRL_1$       | 0.20               | 0.08               | 0.19               | 0.01               |
|                                   | $TRL_0 \leftrightarrow TRL_2$       | 0.19               | 0.07               | 0.17               | 0.00               |
|                                   | $TRL_0 \leftrightarrow TRL_3$ (Ex.) | 0.06               | 0.05               | 0.10               | 0.13               |
|                                   | $TR_0 \leftrightarrow TR_1$         | 0.18               | 0.06               | 0.20               | 0.00               |
|                                   | $TR_0 \leftrightarrow TR_2$         | 0.13               | 0.13               | 0.03               | 0.03               |
|                                   | $TR_0 \leftrightarrow TR_3$         | 0.18               | 0.06               | 0.24               | 0.02               |
| Ehrlich-Schwoebel-barrier         | $E_0 \leftrightarrow E_1$           | 0.26               | 0.17               | 0.39               | 0.22               |
|                                   | $E_0 \leftrightarrow E_1$ (Ex.)     | 0.23               | 0.14               | 0.28               | 0.11               |
| Ehrlich-Schwoebel-barrier (dimer) | $ED_0 \leftrightarrow ED_1$         | 0.26               | 0.31               | 0.38               | 0.41               |
|                                   | $ED_0 \leftrightarrow ED_1$ (Ex.)   | 0.23               | 0.28               | 0.22               | 0.24               |
| Upper step                        | $US_0 \leftrightarrow US_1$         | 0.12               | 0.12               | 0.08               | 0.08               |
|                                   | $US_0 \leftrightarrow US_2$         | 0.07               | 0.06               | 0.02               | 0.01               |
|                                   | $US_1 \leftrightarrow US_2$ (Ex.)   | 0.06               | 0.05               | 0.06               | 0.05               |

**Table V:** Calculated forward (for) and reversed (rev) room-temperature reaction rates ( $k_{@RT}$ ) for the various diffusion pathways on Na(100) and Li(100). For Sodium, we assumed a pre-exponential factor of  $\nu = 5 \cdot 10^{12}$  Hz. The values for lithium have been adapted from Ref 2. All values are reported in Hz and have been obtained by means of DFT-PBE.

| System                           | Pathway                             | Na(100)                |                        | Li(100)                |                        |
|----------------------------------|-------------------------------------|------------------------|------------------------|------------------------|------------------------|
|                                  |                                     | $k_{@RT}^{\text{for}}$ | $k_{@RT}^{\text{rev}}$ | $k_{@RT}^{\text{for}}$ | $k_{@RT}^{\text{rev}}$ |
| Step-edge                        | $S_0 \leftrightarrow S_1$           | $3.2 \cdot 10^{10}$    | $3.2 \cdot 10^{10}$    | $1.4 \cdot 10^{11}$    | $1.4 \cdot 10^{11}$    |
|                                  | $S_0 \leftrightarrow S_2$           | $1.5 \cdot 10^{10}$    | $7.1 \cdot 10^{11}$    | $1.4 \cdot 10^9$       | $4.5 \cdot 10^{12}$    |
|                                  | $S_{1a} \leftrightarrow S_2$ (Ex.)  | $1.5 \cdot 10^{10}$    | $4.8 \cdot 10^{11}$    | $4.4 \cdot 10^8$       | $4.8 \cdot 10^{11}$    |
| Step-vacancy                     | $SV_0 \leftrightarrow SV_1$         | $1.9 \cdot 10^{07}$    | $4.8 \cdot 10^{11}$    | $5.7 \cdot 10^{04}$    | ---                    |
|                                  | $SV_0 \leftrightarrow SV_2$ (Ex.)   | $2.1 \cdot 10^{09}$    | $1.1 \cdot 10^{12}$    | $1.6 \cdot 10^6$       | $2.6 \cdot 10^{11}$    |
| Kink                             | $K_0 \leftrightarrow K_1$           | $1.4 \cdot 10^{09}$    | $6.9 \cdot 10^{10}$    | $3.0 \cdot 10^9$       | $3.8 \cdot 10^{11}$    |
|                                  | $K_0 \leftrightarrow K_2$           | $2.0 \cdot 10^{08}$    | $4.8 \cdot 10^{11}$    | $1.7 \cdot 10^7$       | $9.5 \cdot 10^{11}$    |
|                                  | $K_1 \leftrightarrow K_3$           | $3.2 \cdot 10^{10}$    | $7.1 \cdot 10^{11}$    | $2.8 \cdot 10^8$       | $6.3 \cdot 10^{11}$    |
|                                  | $K_0 \leftrightarrow K_4$ (Ex.)     | $4.5 \cdot 10^{09}$    | $2.2 \cdot 10^{11}$    | $2.2 \cdot 10^8$       | $1.1 \cdot 10^{11}$    |
| Inner-corner                     | $IC_0 \leftrightarrow IC_1$         | $3.1 \cdot 10^{09}$    | $1.0 \cdot 10^{11}$    | $2.1 \cdot 10^9$       | $4.1 \cdot 10^{11}$    |
|                                  | $IC_1 \leftrightarrow IC_2$         | $4.5 \cdot 10^{09}$    | $2.2 \cdot 10^{11}$    | $2.1 \cdot 10^8$       | $6.1 \cdot 10^{12}$    |
| Outer-corner                     | $OC_0 \leftrightarrow OC_1$         | $3.1 \cdot 10^{09}$    | $1.5 \cdot 10^{11}$    | $1.2 \cdot 10^9$       | $1.5 \cdot 10^{12}$    |
|                                  | $OC_0 \leftrightarrow OC_2$         | $6.7 \cdot 10^{09}$    | $4.8 \cdot 10^{11}$    | $2.3 \cdot 10^9$       | $2.2 \cdot 10^{12}$    |
|                                  | $OC_0 \leftrightarrow OC_3$         | $3.2 \cdot 10^{10}$    | $4.7 \cdot 10^{10}$    | $3.1 \cdot 10^{11}$    | $2.1 \cdot 10^{11}$    |
|                                  | $OC_0 \leftrightarrow OC_4$ (Ex.)   | $1.1 \cdot 10^{12}$    | $1.1 \cdot 10^{12}$    | $3.7 \cdot 10^{10}$    | $2.5 \cdot 10^{10}$    |
| Dimer                            | $D_0 \leftrightarrow D_1$           | $1.4 \cdot 10^{09}$    | $3.3 \cdot 10^{11}$    | $1.0 \cdot 10^9$       | $3.4 \cdot 10^{12}$    |
|                                  | $D_0 \leftrightarrow D_2$ (Ex. *)   | $2.1 \cdot 10^{09}$    | $4.8 \cdot 10^{11}$    | $2.0 \cdot 10^8$       | $4.8 \cdot 10^{11}$    |
|                                  | $D_0 \leftrightarrow D_3$           | $4.5 \cdot 10^{09}$    | $1.1 \cdot 10^{12}$    | $2.1 \cdot 10^{10}$    | ---                    |
|                                  | $D_0 \leftrightarrow D_4$ (Ex.)     | $7.1 \cdot 10^{11}$    | $7.1 \cdot 10^{11}$    | $9.3 \cdot 10^{10}$    | $9.3 \cdot 10^{10}$    |
| Concerted dimer                  | $CD_0 \leftrightarrow CD_1$         | $6.3 \cdot 10^{07}$    | $6.3 \cdot 10^{07}$    | $3.4 \cdot 10^{10}$    | $3.4 \cdot 10^{10}$    |
|                                  | $CD_0 \leftrightarrow CD_2$         | $4.4 \cdot 10^{08}$    | $4.4 \cdot 10^{08}$    | $9.9 \cdot 10^8$       | $9.9 \cdot 10^8$       |
| Trimer                           | $TRL_0 \leftrightarrow TRL_1$       | $2.1 \cdot 10^{09}$    | $2.2 \cdot 10^{11}$    | $2.6 \cdot 10^9$       | $2.2 \cdot 10^{12}$    |
|                                  | $TRL_0 \leftrightarrow TRL_2$       | $3.1 \cdot 10^{09}$    | $3.3 \cdot 10^{11}$    | $6.7 \cdot 10^9$       | ---                    |
|                                  | $TRL_0 \leftrightarrow TRL_3$ (Ex.) | $4.8 \cdot 10^{11}$    | $7.1 \cdot 10^{11}$    | $5.1 \cdot 10^{10}$    | $1.5 \cdot 10^{10}$    |
|                                  | $TR_0 \leftrightarrow TR_1$         | $4.5 \cdot 10^{09}$    | $4.8 \cdot 10^{11}$    | $2.1 \cdot 10^9$       | ---                    |
|                                  | $TR_0 \leftrightarrow TR_2$         | $3.2 \cdot 10^{10}$    | $3.2 \cdot 10^{10}$    | $3.1 \cdot 10^{11}$    | $3.1 \cdot 10^{11}$    |
|                                  | $TR_0 \leftrightarrow TR_3$         | $4.5 \cdot 10^{09}$    | $4.8 \cdot 10^{11}$    | $1.8 \cdot 10^8$       | $8.3 \cdot 10^{11}$    |
| Ehrlich-Schwöbel-barrier         | $E_0 \leftrightarrow E_1$           | $2.0 \cdot 10^{08}$    | $6.7 \cdot 10^{09}$    | $1.9 \cdot 10^6$       | $1.9 \cdot 10^{09}$    |
|                                  | $E_0 \leftrightarrow E_1$ (Ex.)     | $6.5 \cdot 10^{08}$    | $2.2 \cdot 10^{10}$    | $1.6 \cdot 10^8$       | $1.5 \cdot 10^{11}$    |
| Ehrlich-Schwöbel-barrier (dimer) | $ED_0 \leftrightarrow ED_1$         | $2.0 \cdot 10^{08}$    | $2.9 \cdot 10^{07}$    | $3.6 \cdot 10^6$       | $3.4 \cdot 10^{05}$    |
|                                  | $ED_0 \leftrightarrow ED_1$ (Ex.)   | $6.5 \cdot 10^{08}$    | $9.2 \cdot 10^{07}$    | $1.7 \cdot 10^9$       | $6.1 \cdot 10^{08}$    |
| Upper step                       | $US_0 \leftrightarrow US_1$         | $4.7 \cdot 10^{10}$    | $4.7 \cdot 10^{10}$    | $2.2 \cdot 10^{11}$    | $2.2 \cdot 10^{11}$    |
|                                  | $US_0 \leftrightarrow US_2$         | $3.3 \cdot 10^{11}$    | $4.8 \cdot 10^{11}$    | $9.6 \cdot 10^{11}$    | $8.8 \cdot 10^{11}$    |
|                                  | $US_1 \leftrightarrow US_2$ (Ex.)   | $4.8 \cdot 10^{11}$    | $7.1 \cdot 10^{11}$    | $4.8 \cdot 10^{11}$    | $7.1 \cdot 10^{11}$    |



## Terrace

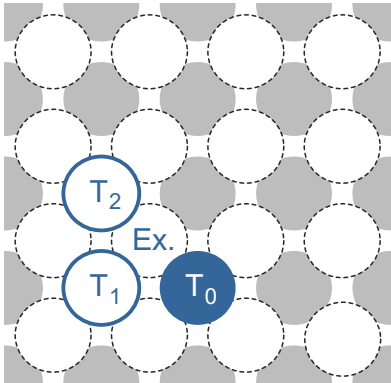

| Pathway                         | Na(100)            |                    | Li(100)            |                    |
|---------------------------------|--------------------|--------------------|--------------------|--------------------|
|                                 | $E_a^{\text{for}}$ | $E_a^{\text{rev}}$ | $E_a^{\text{for}}$ | $E_a^{\text{rev}}$ |
| $T_0 \leftrightarrow T_1$       | 0.09               | 0.09               | 0.04               | 0.04               |
| $T_0 \leftrightarrow T_1$ (Ex.) | 0.12               | 0.12               | 0.14               | 0.14               |
| $T_0 \leftrightarrow T_2$       | 0.31               | 0.31               | 0.20               | 0.20               |
| $T_0 \leftrightarrow T_2$ (Ex.) | 0.06               | 0.06               | 0.11               | 0.11               |

## Sodium

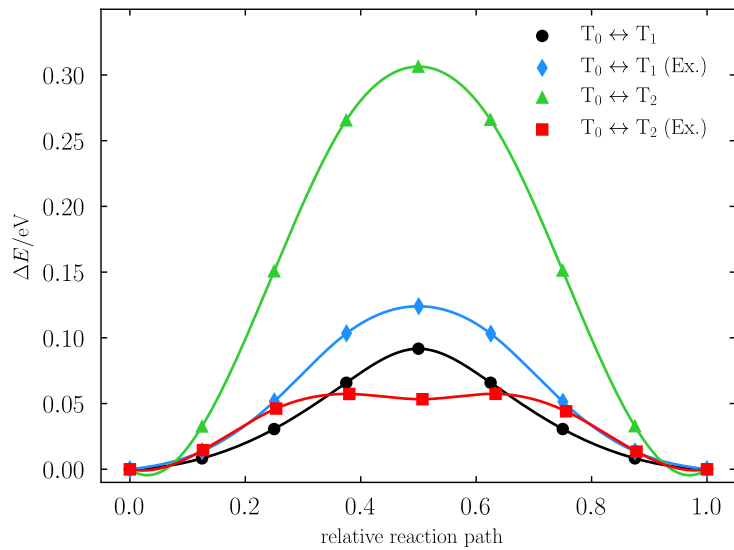

## Lithium

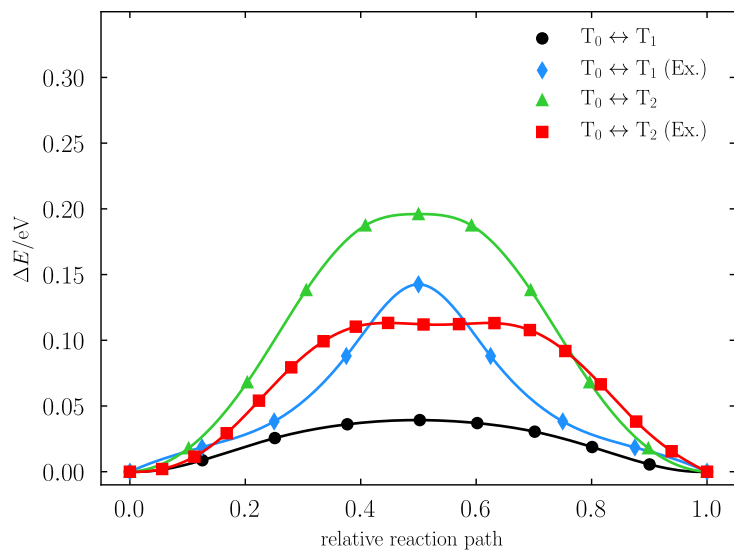

## Step-edge

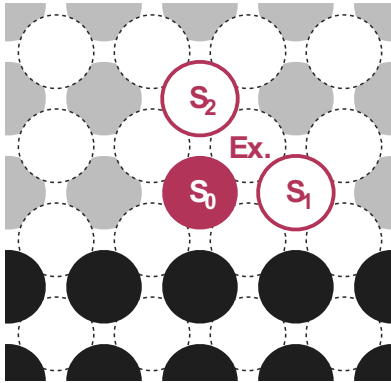

| Pathway                         | Na(100)            |                    | Li(100)            |                    |
|---------------------------------|--------------------|--------------------|--------------------|--------------------|
|                                 | $E_a^{\text{for}}$ | $E_a^{\text{rev}}$ | $E_a^{\text{for}}$ | $E_a^{\text{rev}}$ |
| $S_0 \leftrightarrow S_1$       | 0.13               | 0.13               | 0.09               | 0.09               |
| $S_0 \leftrightarrow S_2$       | 0.15               | 0.05               | 0.19               | 0.01               |
| $S_1 \leftrightarrow S_2$ (Ex.) | 0.15               | 0.06               | 0.24               | 0.06               |

## Sodium

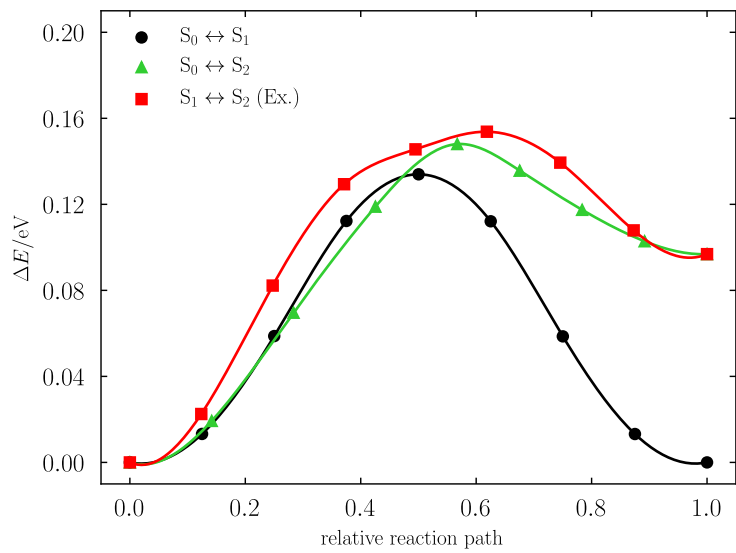

## Lithium

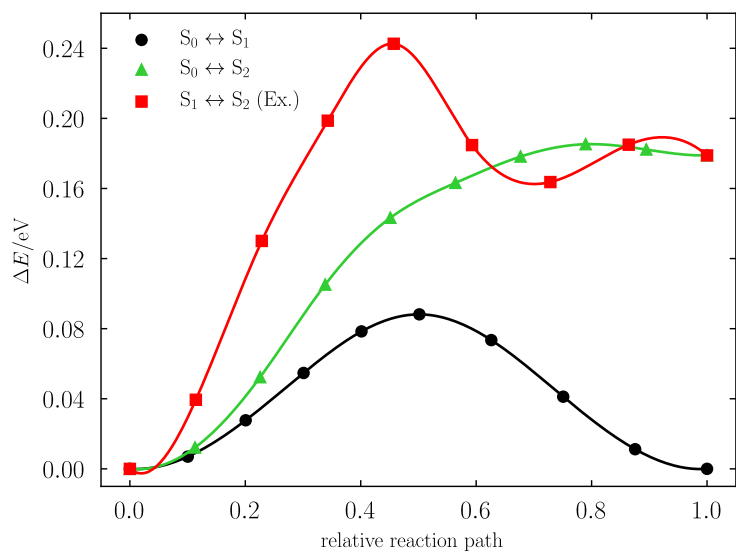

## Step-vacancy

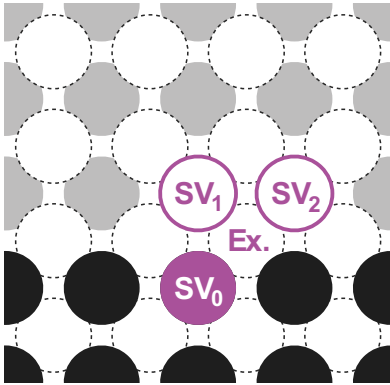

| Pathway                           | Na(100)            |                    | Li(100)            |                    |
|-----------------------------------|--------------------|--------------------|--------------------|--------------------|
|                                   | $E_a^{\text{for}}$ | $E_a^{\text{rev}}$ | $E_a^{\text{for}}$ | $E_a^{\text{rev}}$ |
| $SV_0 \leftrightarrow SV_1$       | 0.32               | 0.06               | 0.47               | 0.00               |
| $SV_0 \leftrightarrow SV_2$ (Ex.) | 0.20               | 0.04               | 0.39               | 0.07               |

## Sodium

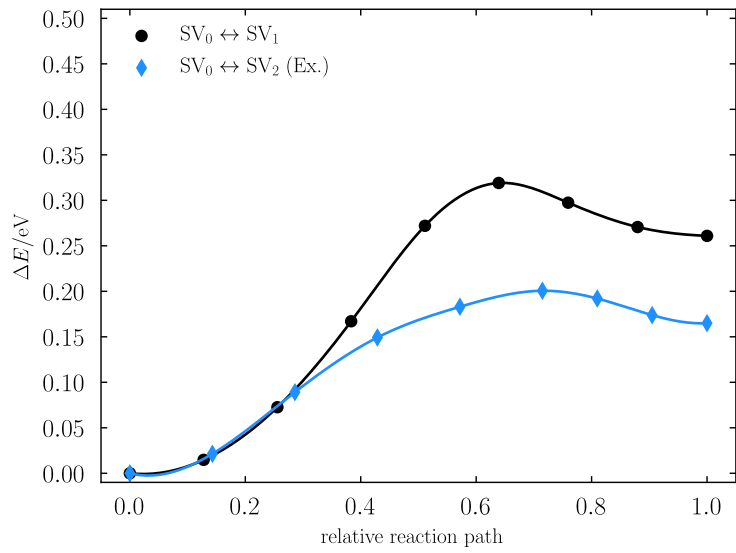

## Lithium

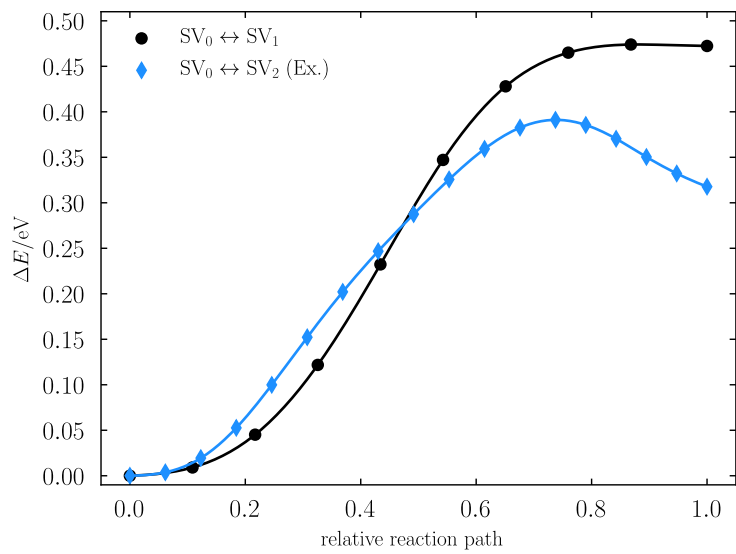

## Kink

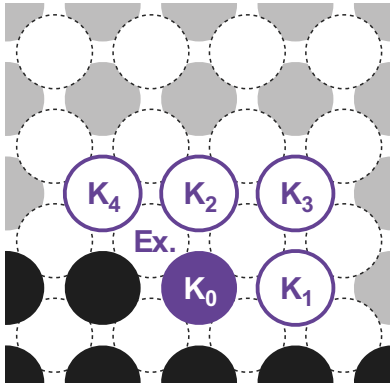

| Pathway                         | Na(100)            |                    | Li(100)            |                    |
|---------------------------------|--------------------|--------------------|--------------------|--------------------|
|                                 | $E_a^{\text{for}}$ | $E_a^{\text{rev}}$ | $E_a^{\text{for}}$ | $E_a^{\text{rev}}$ |
| $K_0 \leftrightarrow K_1$       | 0.21               | 0.11               | 0.20               | 0.06               |
| $K_0 \leftrightarrow K_2$       | 0.26               | 0.06               | 0.34               | 0.01               |
| $K_1 \leftrightarrow K_3$       | 0.13               | 0.05               | 0.24               | 0.04               |
| $K_0 \leftrightarrow K_4$ (Ex.) | 0.18               | 0.08               | 0.26               | 0.09               |

## Sodium

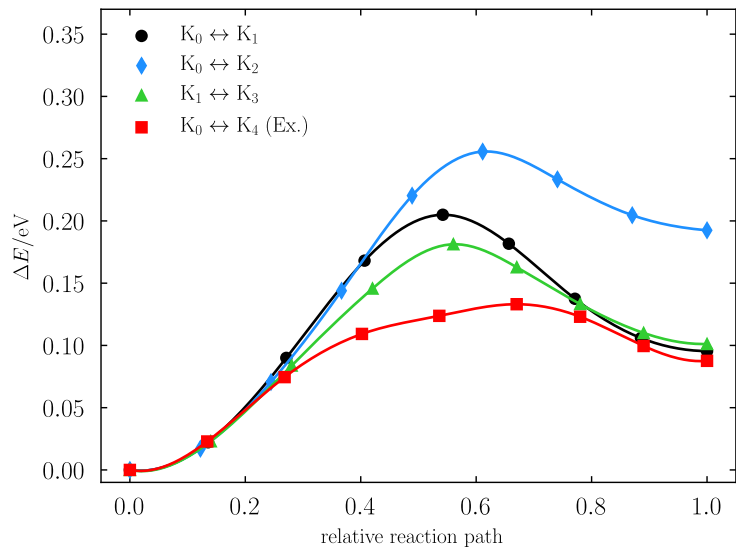

## Lithium

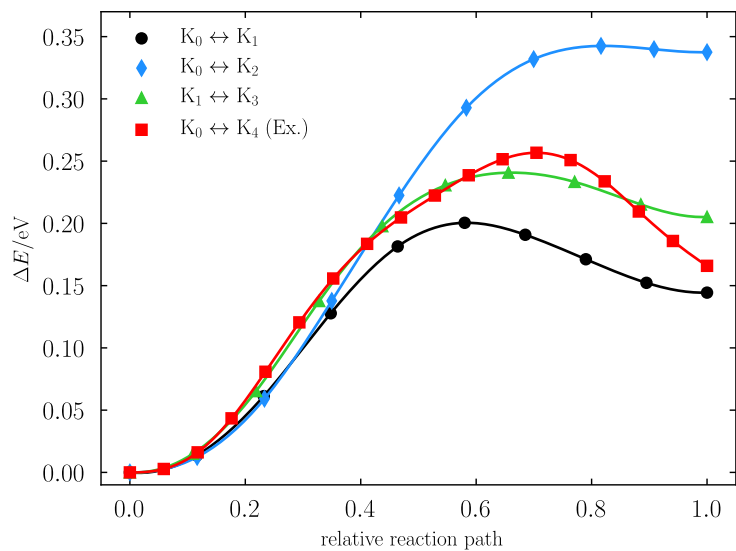

## Inner-corner

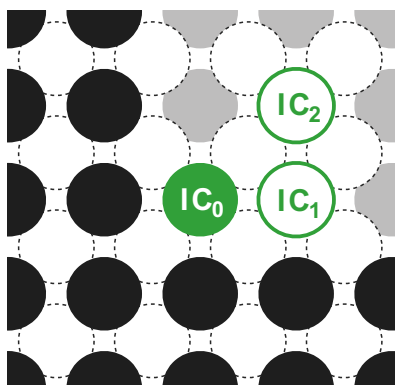

| Pathway                                | Na(100)            |                    | Li(100)            |                    |
|----------------------------------------|--------------------|--------------------|--------------------|--------------------|
|                                        | $E_a^{\text{for}}$ | $E_a^{\text{rev}}$ | $E_a^{\text{for}}$ | $E_a^{\text{rev}}$ |
| IC <sub>0</sub> ↔IC <sub>1</sub>       | 0.19               | 0.10               | 0.20               | 0.05               |
| IC <sub>1</sub> ↔IC <sub>2</sub>       | 0.18               | 0.08               | 0.25               | 0.04               |
| IC <sub>0</sub> ↔IC <sub>2</sub> (Ex.) | 0.27               | 0.07               | 0.45               | 0.11               |

## Sodium

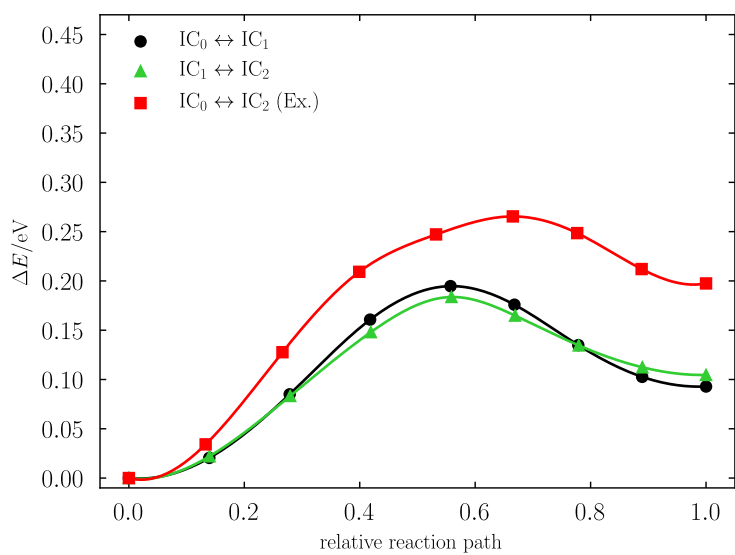

## Lithium

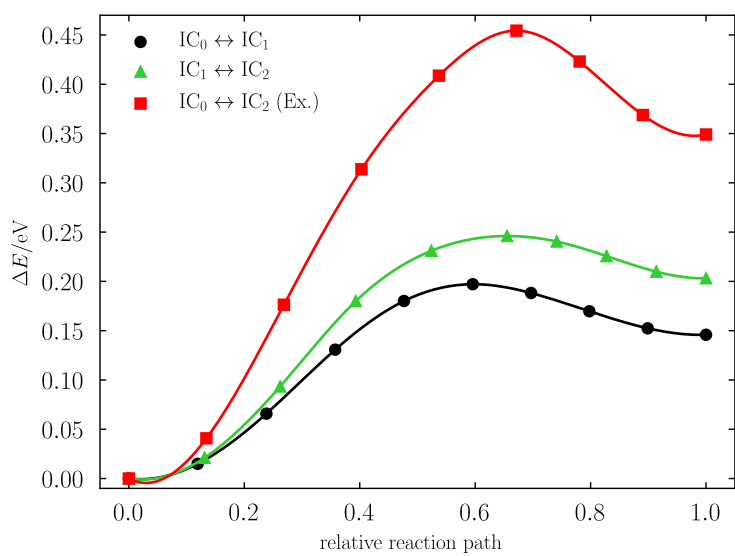

## Outer-corner

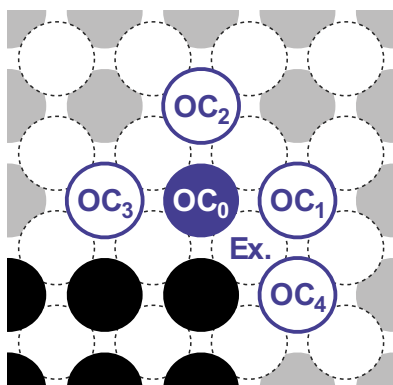

| Pathway                         | Na(100)            |                    | Li(100)            |                    |
|---------------------------------|--------------------|--------------------|--------------------|--------------------|
|                                 | $E_a^{\text{for}}$ | $E_a^{\text{rev}}$ | $E_a^{\text{for}}$ | $E_a^{\text{rev}}$ |
| OC0 $\leftrightarrow$ OC1       | 0.19               | 0.09               | 0.21               | 0.02               |
| OC0 $\leftrightarrow$ OC2       | 0.17               | 0.06               | 0.19               | 0.01               |
| OC0 $\leftrightarrow$ OC3       | 0.13               | 0.12               | 0.06               | 0.07               |
| OC0 $\leftrightarrow$ OC4 (Ex.) | 0.04               | 0.04               | 0.11               | 0.12               |

## Sodium

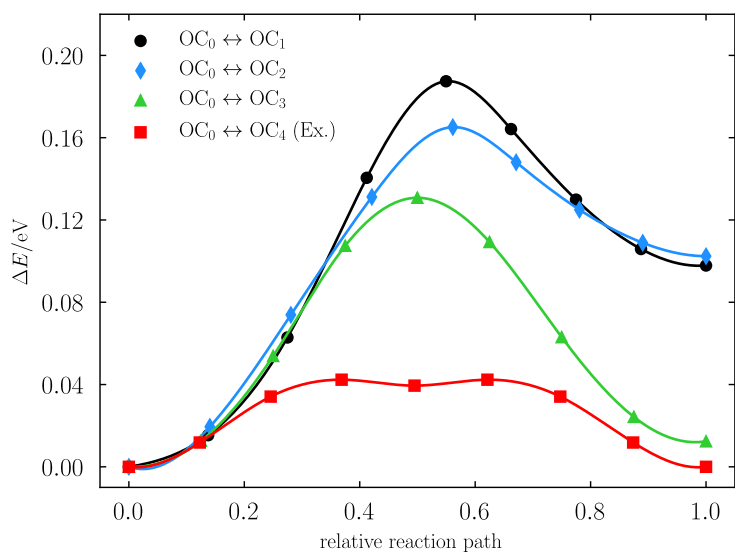

## Lithium

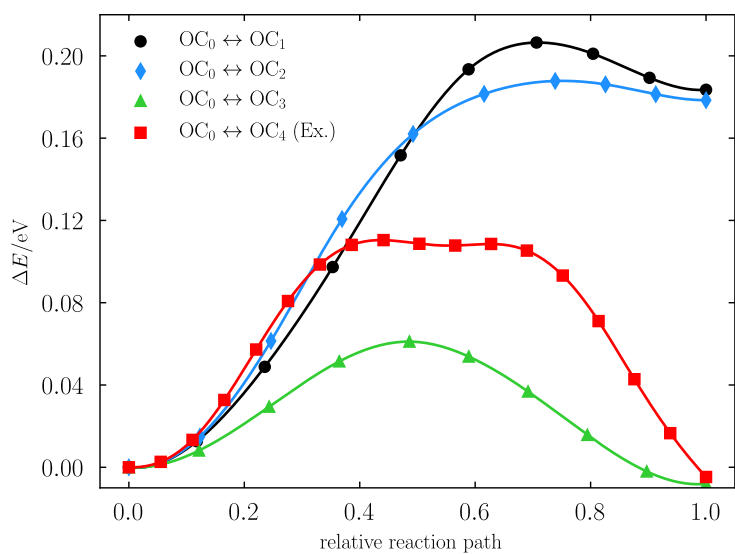

## Dimer

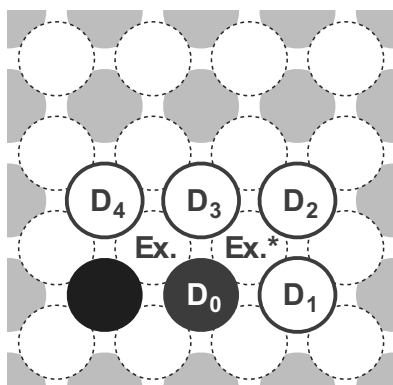

| Pathway                          | Na(100)            |                    | Li(100)            |                    |
|----------------------------------|--------------------|--------------------|--------------------|--------------------|
|                                  | $E_a^{\text{for}}$ | $E_a^{\text{rev}}$ | $E_a^{\text{for}}$ | $E_a^{\text{rev}}$ |
| $D_0 \leftrightarrow D_1$        | 0.21               | 0.07               | 0.21               | 0.01               |
| $D_0 \leftrightarrow D_2$ (Ex.*) | 0.20               | 0.06               | 0.26               | 0.06               |
| $D_0 \leftrightarrow D_3$        | 0.18               | 0.04               | 0.14               | 0.00               |
| $D_0 \leftrightarrow D_4$ (Ex.)  | 0.05               | 0.05               | 0.08               | 0.08               |

## Sodium

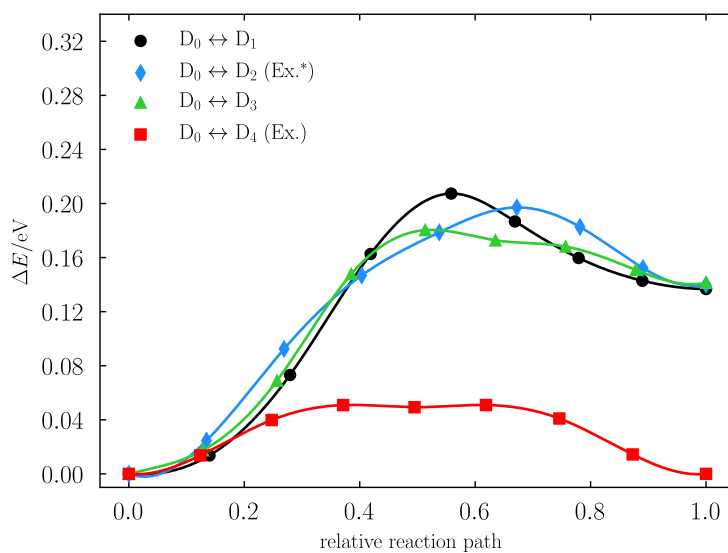

## Lithium

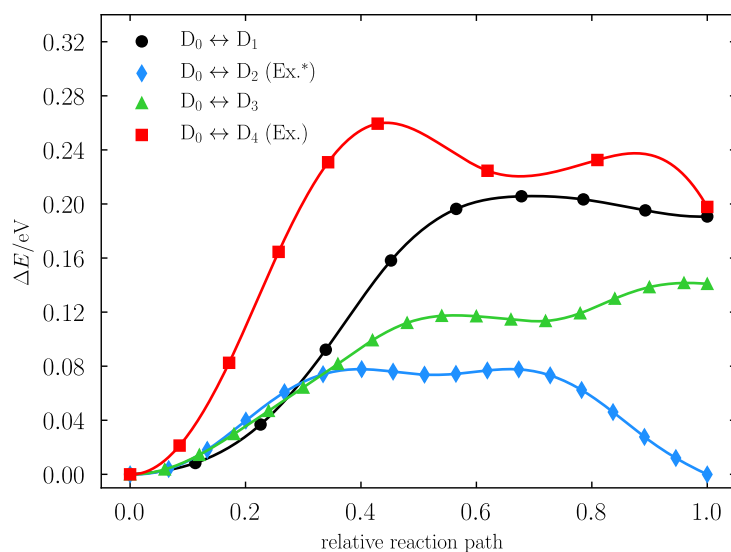

S

## Concerted dimer

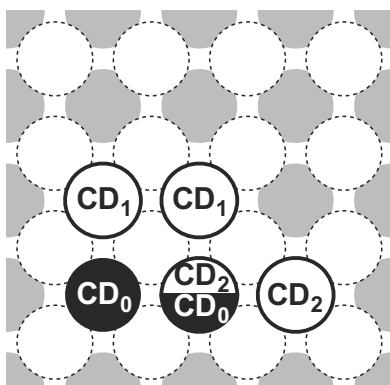

| Pathway                                   | Na(100)            |                    | Li(100)            |                    |
|-------------------------------------------|--------------------|--------------------|--------------------|--------------------|
|                                           | $E_a^{\text{for}}$ | $E_a^{\text{rev}}$ | $E_a^{\text{for}}$ | $E_a^{\text{rev}}$ |
| $\text{CD}_0 \leftrightarrow \text{CD}_1$ | 0.29               | 0.29               | 0.14               | 0.14               |
| $\text{CD}_0 \leftrightarrow \text{CD}_2$ | 0.24               | 0.24               | 0.21               | 0.21               |

## Sodium

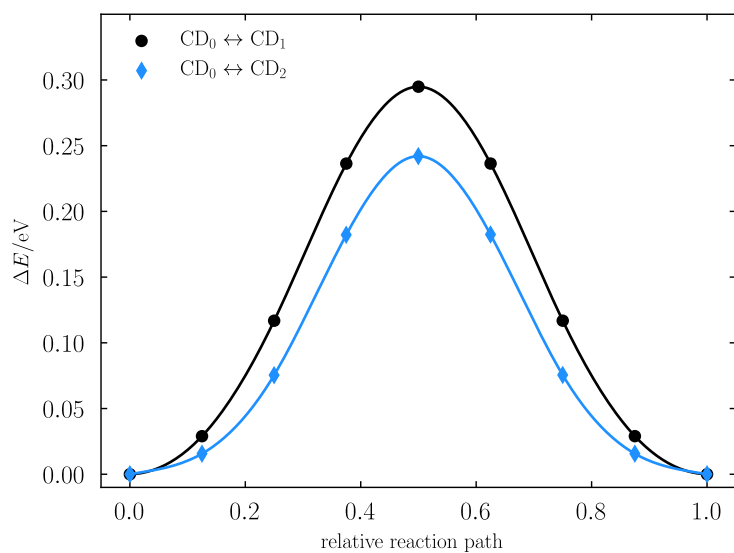

## Lithium

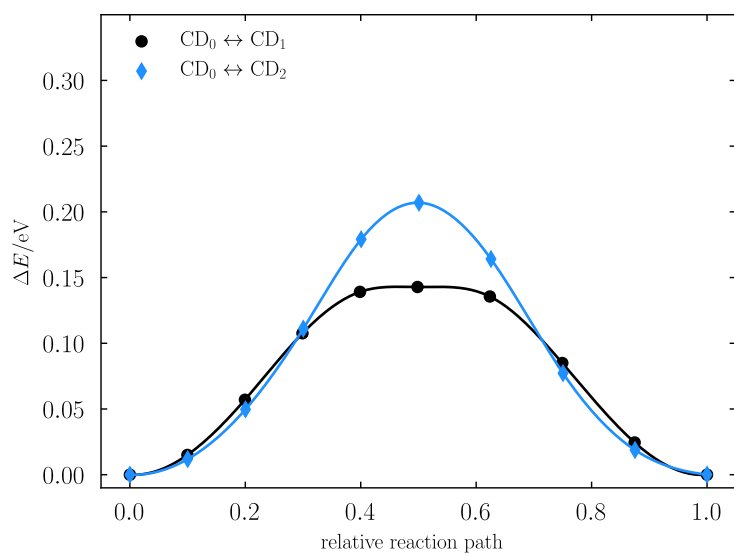



### Trimer (linear)

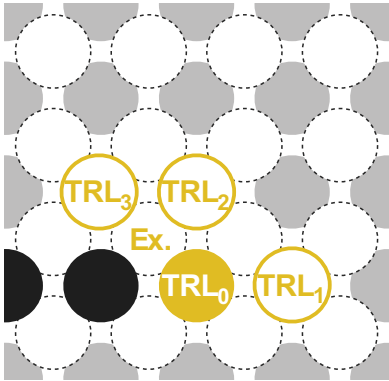

| Pathway                                                  | Na(100)            |                    | Li(100)            |                    |
|----------------------------------------------------------|--------------------|--------------------|--------------------|--------------------|
|                                                          | $E_a^{\text{for}}$ | $E_a^{\text{rev}}$ | $E_a^{\text{for}}$ | $E_a^{\text{rev}}$ |
| $\text{TRL}_0 \leftrightarrow \text{TRL}_1$              | 0.20               | 0.08               | 0.19               | 0.01               |
| $\text{TRL}_0 \leftrightarrow \text{TRL}_2$              | 0.19               | 0.07               | 0.17               | 0.00               |
| $\text{TRL}_0 \leftrightarrow \text{TRL}_3 (\text{Ex.})$ | 0.06               | 0.05               | 0.10               | 0.13               |

### Sodium

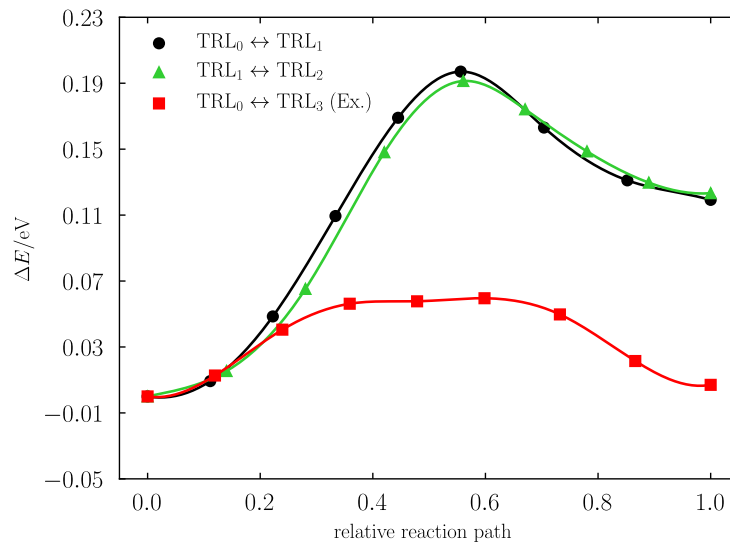

### Lithium

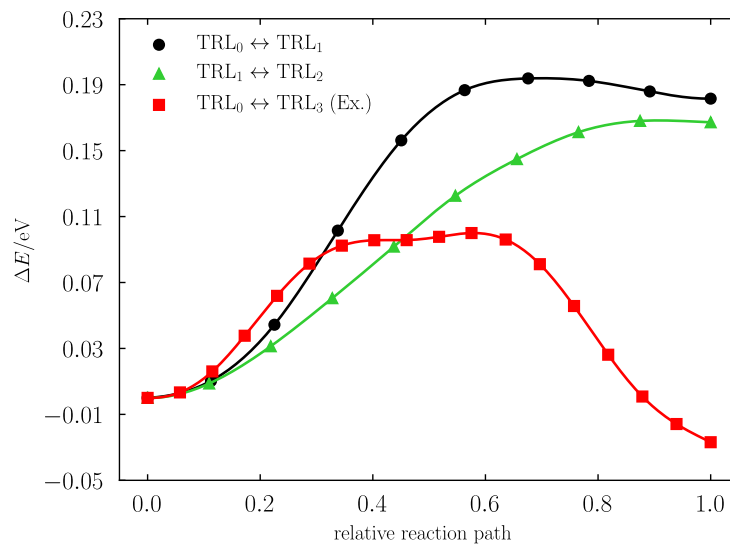

### Trimer (linear)

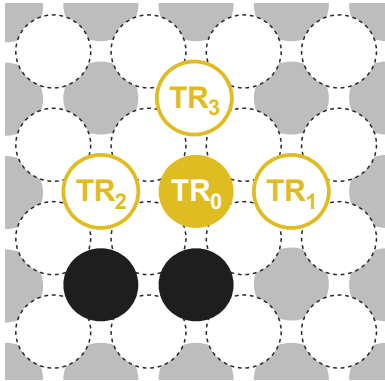

| Pathway                                   | Na(100)            |                    | Li(100)            |                    |
|-------------------------------------------|--------------------|--------------------|--------------------|--------------------|
|                                           | $E_a^{\text{for}}$ | $E_a^{\text{rev}}$ | $E_a^{\text{for}}$ | $E_a^{\text{rev}}$ |
| TRL <sub>0</sub> ↔ TRL <sub>1</sub>       | 0.20               | 0.08               | 0.19               | 0.01               |
| TRL <sub>0</sub> ↔ TRL <sub>2</sub>       | 0.19               | 0.07               | 0.17               | 0.00               |
| TRL <sub>0</sub> ↔ TRL <sub>3</sub> (Ex.) | 0.06               | 0.05               | 0.10               | 0.13               |

### Sodium

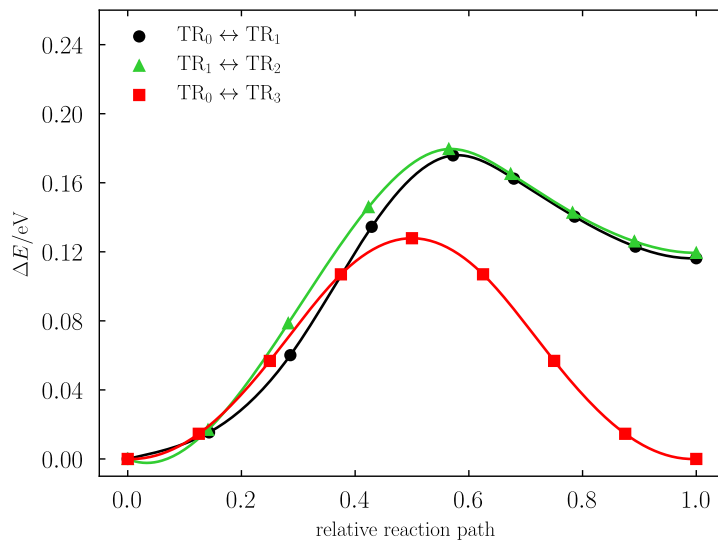

### Lithium

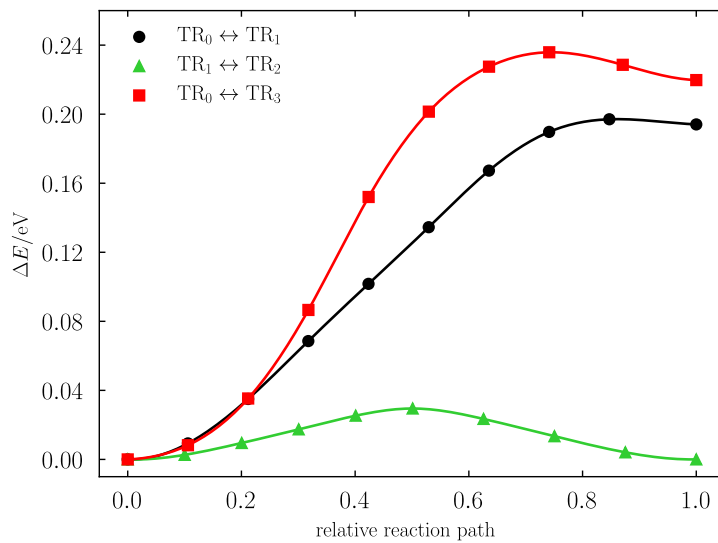

## Ehrlich-Schwoebel-barrier

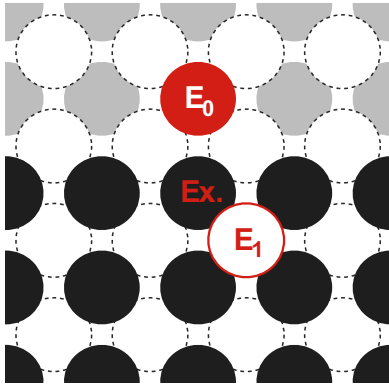

| Pathway                         | Na(100)            |                    | Li(100)            |                    |
|---------------------------------|--------------------|--------------------|--------------------|--------------------|
|                                 | $E_a^{\text{for}}$ | $E_a^{\text{rev}}$ | $E_a^{\text{for}}$ | $E_a^{\text{rev}}$ |
| $E_0 \leftrightarrow E_1$       | 0.26               | 0.17               | 0.39               | 0.22               |
| $E_0 \leftrightarrow E_1$ (Ex.) | 0.23               | 0.14               | 0.28               | 0.11               |

## Sodium

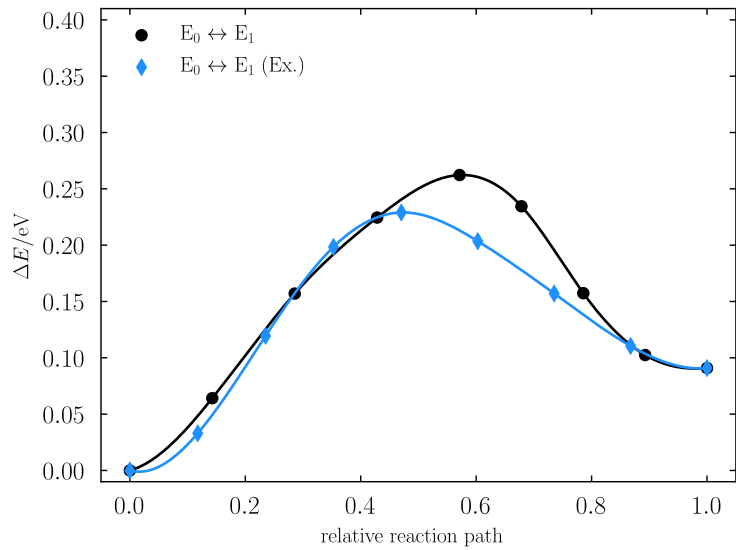

## Lithium

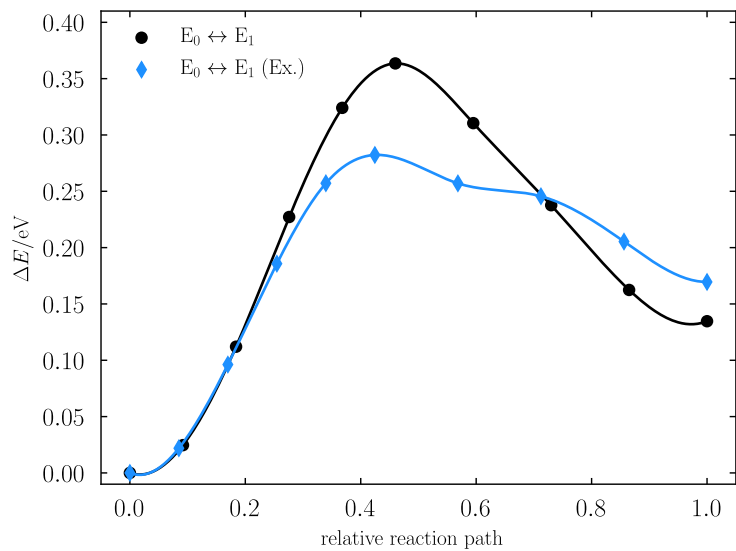

### Ehrlich-Schwoebel-barrier (dimer)

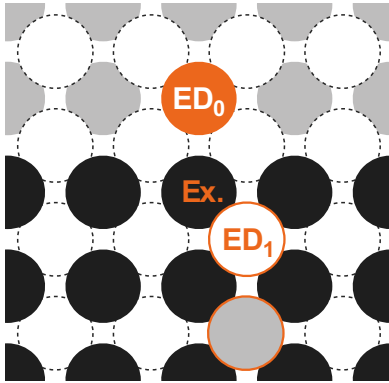

| Pathway                                                | Na(100)            |                    | Li(100)            |                    |
|--------------------------------------------------------|--------------------|--------------------|--------------------|--------------------|
|                                                        | $E_a^{\text{for}}$ | $E_a^{\text{rev}}$ | $E_a^{\text{for}}$ | $E_a^{\text{rev}}$ |
| $\text{ED}_0 \leftrightarrow \text{ED}_1$              | 0.26               | 0.31               | 0.38               | 0.41               |
| $\text{ED}_0 \leftrightarrow \text{ED}_1 (\text{Ex.})$ | 0.23               | 0.28               | 0.22               | 0.24               |

### Sodium

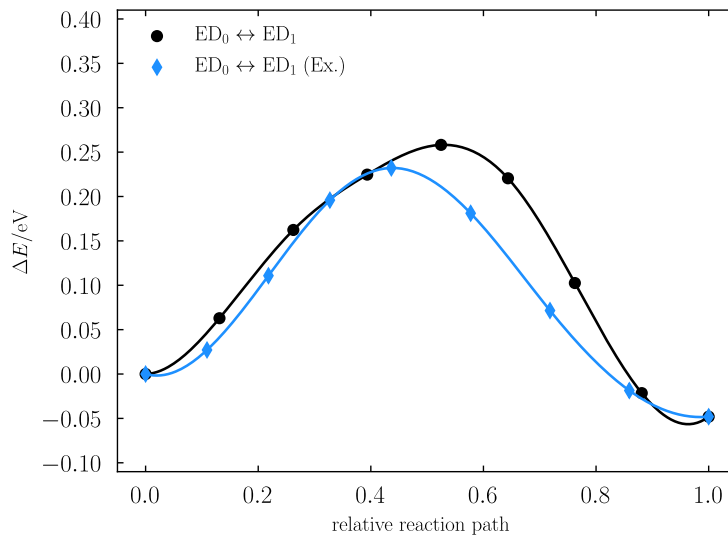

### Lithium

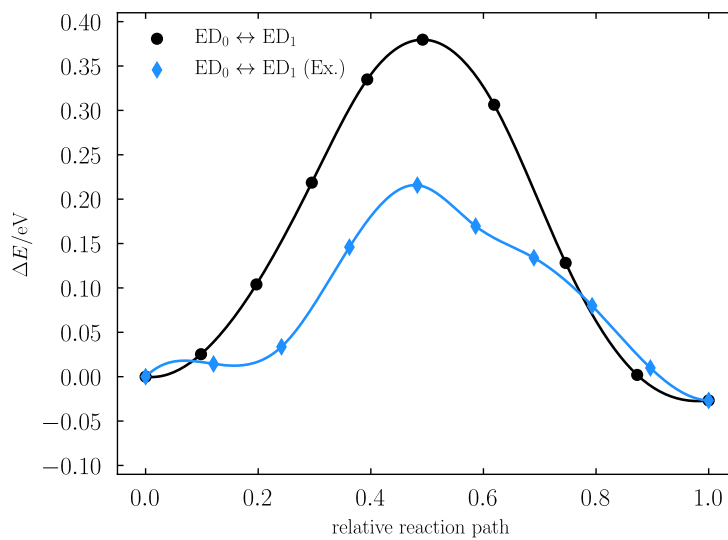

## Upper step

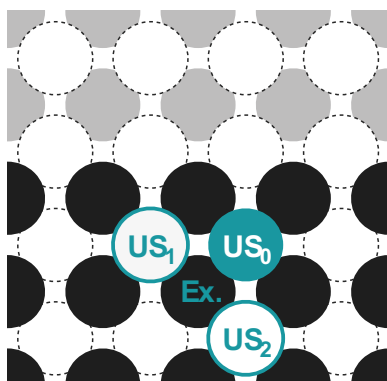

| Pathway                                         | Na(100)            |                    | Li(100)            |                    |
|-------------------------------------------------|--------------------|--------------------|--------------------|--------------------|
|                                                 | $E_a^{\text{for}}$ | $E_a^{\text{rev}}$ | $E_a^{\text{for}}$ | $E_a^{\text{rev}}$ |
| $\text{US}_0 \leftrightarrow \text{US}_1$       | 0.12               | 0.12               | 0.08               | 0.08               |
| $\text{US}_0 \leftrightarrow \text{US}_2$       | 0.07               | 0.06               | 0.02               | 0.01               |
| $\text{US}_1 \leftrightarrow \text{US}_2$ (Ex.) | 0.06               | 0.05               | 0.06               | 0.05               |

## Sodium

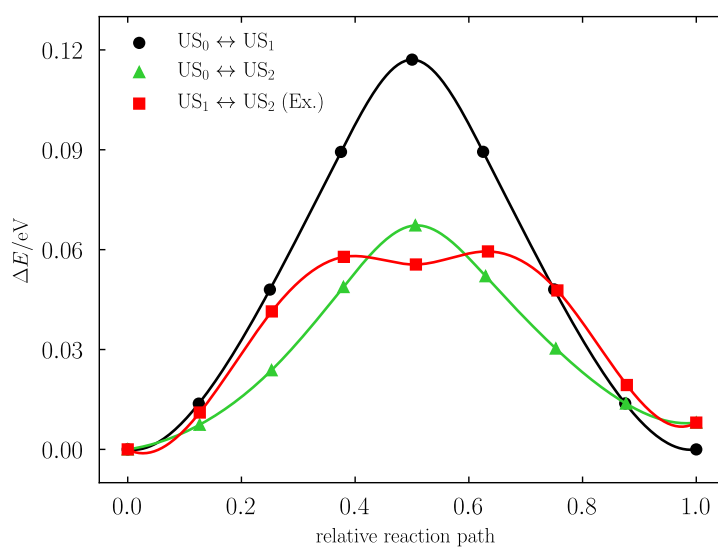

## Lithium

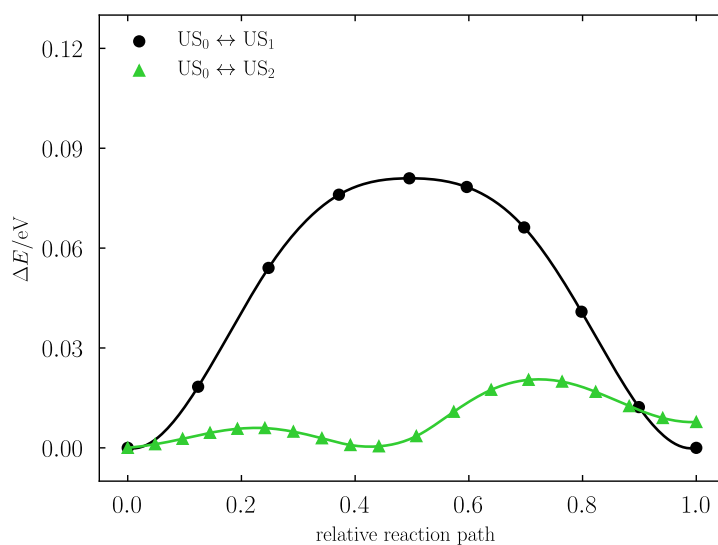

### C. Diffusion properties on Na(110)

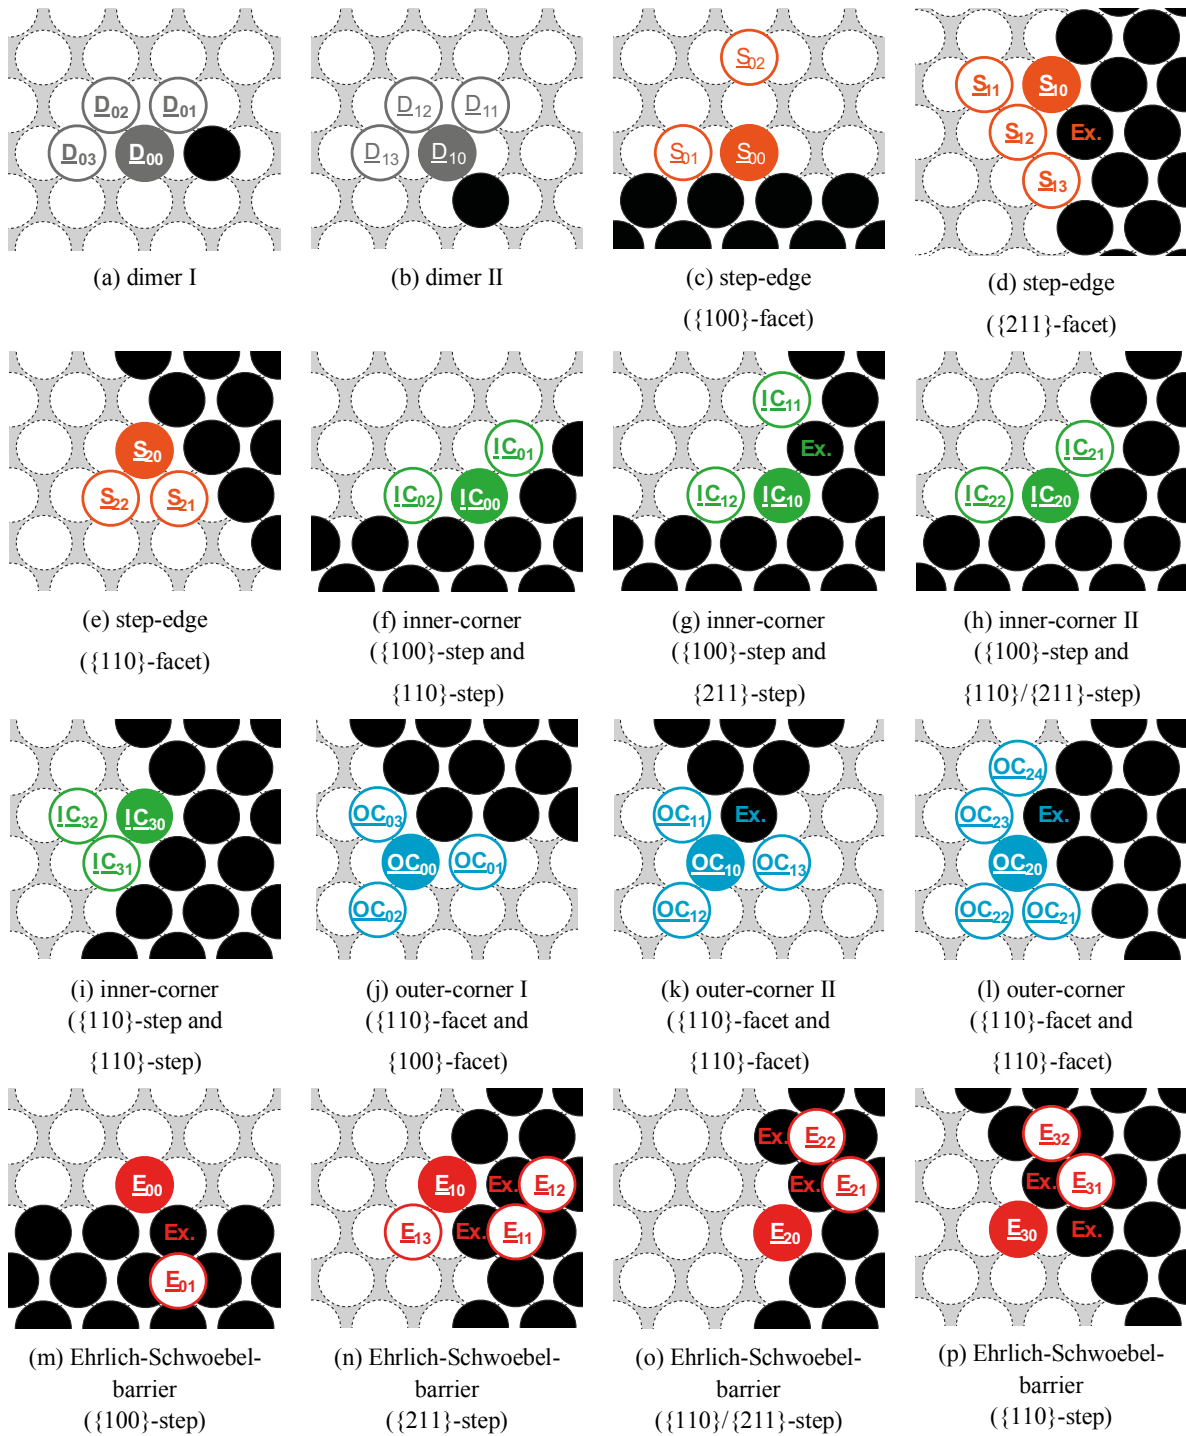

**Fig. 3:** Schematic representation of the investigated self-diffusion on Na(110). Filled circle marks the initial position, while a framed circle indicates possible final positions of the diffusion pathway. Circles labeled by Ex. mark atoms participating in the exchange process. For all illustrated processes, the characteristic values are listed in [Table VI](#) and [Table VII](#).

Gelösch

Gelösch

**Table VI:** Calculated forward (for) and reversed (rev) activation energies ( $E_a$ ) as well as forward (for) and reversed (rev) rate constants ( $k_{@RT}$ ) for the various diffusion pathways on Na(110). For the pre-exponential factor we assumed a value of  $\nu = 5 \cdot 10^{12}$  Hz. All activation energies are reported in eV as well as the reaction rates in Hz. All values have been obtained by means of DFT-PBE.

| System       | Pathway                                                         | $E_a^{\text{for}}$ | $E_a^{\text{rev}}$ | $k_{@RT}^{\text{for}}$ | $k_{@RT}^{\text{rev}}$ |
|--------------|-----------------------------------------------------------------|--------------------|--------------------|------------------------|------------------------|
| Dimer        | $\underline{D}_{00} \leftrightarrow \underline{D}_{01}$         | 0.03               | 0.02               | $1.6 \cdot 10^{12}$    | $2.3 \cdot 10^{12}$    |
|              | $\underline{D}_{00} \leftrightarrow \underline{D}_{02}$         | 0.15               | 0.01               | $1.5 \cdot 10^{10}$    | $3.4 \cdot 10^{12}$    |
|              | $\underline{D}_{00} \leftrightarrow \underline{D}_{03}$         | 0.13               | 0.00               | $3.2 \cdot 10^{10}$    | $5.0 \cdot 10^{12}$    |
|              | $\underline{D}_{10} \leftrightarrow \underline{D}_{11}$         | 0.04               | 0.00               | $1.1 \cdot 10^{12}$    | $5.0 \cdot 10^{12}$    |
|              | $\underline{D}_{10} \leftrightarrow \underline{D}_{12}$         | 0.10               | 0.02               | $1.0 \cdot 10^{11}$    | $2.3 \cdot 10^{12}$    |
|              | $\underline{D}_{10} \leftrightarrow \underline{D}_{13}$         | 0.14               | 0.01               | $2.2 \cdot 10^{10}$    | $3.4 \cdot 10^{12}$    |
| Step-edge    | $\underline{S}_{00} \leftrightarrow \underline{S}_{01}$         | 0.12               | 0.12               | $4.7 \cdot 10^{10}$    | $4.7 \cdot 10^{10}$    |
|              | $\underline{S}_{00} \leftrightarrow \underline{S}_{02}$         | 0.23               | 0.04               | $6.5 \cdot 10^{08}$    | $1.1 \cdot 10^{12}$    |
|              | $\underline{S}_{10} \leftrightarrow \underline{S}_{11}$         | 0.27               | 0.00               | $1.4 \cdot 10^{08}$    | $5.0 \cdot 10^{12}$    |
|              | $\underline{S}_{10} \leftrightarrow \underline{S}_{12}$         | 0.16               | 0.01               | $9.9 \cdot 10^{09}$    | $3.4 \cdot 10^{12}$    |
|              | $\underline{S}_{10} \leftrightarrow \underline{S}_{13}$ (Ex.)   | 0.08               | 0.08               | $2.2 \cdot 10^{11}$    | $2.2 \cdot 10^{11}$    |
|              | $\underline{S}_{20} \leftrightarrow \underline{S}_{21}$         | 0.03               | 0.03               | $1.6 \cdot 10^{12}$    | $1.6 \cdot 10^{12}$    |
|              | $\underline{S}_{20} \leftrightarrow \underline{S}_{22}$         | 0.19               | 0.00               | $3.1 \cdot 10^{09}$    | $5.0 \cdot 10^{12}$    |
| Inner-corner | $\underline{IC}_{00} \leftrightarrow \underline{IC}_{01}$       | 0.09               | 0.02               | $1.5 \cdot 10^{11}$    | $2.3 \cdot 10^{12}$    |
|              | $\underline{IC}_{00} \leftrightarrow \underline{IC}_{02}$       | 0.18               | 0.10               | $4.5 \cdot 10^{09}$    | $1.0 \cdot 10^{11}$    |
|              | $\underline{IC}_{10} \leftrightarrow \underline{IC}_{11}$ (Ex.) | 0.11               | 0.05               | $6.9 \cdot 10^{10}$    | $7.1 \cdot 10^{11}$    |
|              | $\underline{IC}_{10} \leftrightarrow \underline{IC}_{12}$       | 0.21               | 0.06               | $1.4 \cdot 10^{09}$    | $4.8 \cdot 10^{11}$    |
|              | $\underline{IC}_{20} \leftrightarrow \underline{IC}_{21}$       | 0.07               | 0.07               | $3.3 \cdot 10^{11}$    | $3.3 \cdot 10^{11}$    |
|              | $\underline{IC}_{20} \leftrightarrow \underline{IC}_{22}$       | 0.19               | 0.10               | $3.1 \cdot 10^{09}$    | $1.0 \cdot 10^{11}$    |
|              | $\underline{IC}_{30} \leftrightarrow \underline{IC}_{31}$       | 0.07               | 0.02               | $3.3 \cdot 10^{11}$    | $2.3 \cdot 10^{12}$    |
| Outer-corner | $\underline{OC}_{00} \leftrightarrow \underline{OC}_{01}$       | 0.05               | 0.10               | $7.1 \cdot 10^{11}$    | $1.0 \cdot 10^{11}$    |
|              | $\underline{OC}_{00} \leftrightarrow \underline{OC}_{02}$       | 0.14               | 0.02               | $2.2 \cdot 10^{10}$    | $2.3 \cdot 10^{12}$    |
|              | $\underline{OC}_{00} \leftrightarrow \underline{OC}_{03}$       | 0.05               | 0.12               | $7.1 \cdot 10^{11}$    | $4.7 \cdot 10^{10}$    |
|              | $\underline{OC}_{10} \leftrightarrow \underline{OC}_{11}$       | 0.00               | 0.07               | $5.0 \cdot 10^{12}$    | $3.3 \cdot 10^{11}$    |
|              | $\underline{OC}_{10} \leftrightarrow \underline{OC}_{12}$       | 0.13               | 0.02               | $3.2 \cdot 10^{10}$    | $2.3 \cdot 10^{12}$    |
|              | $\underline{OC}_{10} \leftrightarrow \underline{OC}_{13}$       | 0.04               | 0.04               | $1.1 \cdot 10^{12}$    | $1.1 \cdot 10^{12}$    |
|              | $\underline{OC}_{10} \leftrightarrow \underline{OC}_{13}$ (Ex.) | 0.06               | 0.06               | $4.8 \cdot 10^{11}$    | $4.8 \cdot 10^{11}$    |
|              | $\underline{OC}_{20} \leftrightarrow \underline{OC}_{21}$       | 0.05               | 0.04               | $7.1 \cdot 10^{11}$    | $1.1 \cdot 10^{12}$    |
|              | $\underline{OC}_{20} \leftrightarrow \underline{OC}_{22}$       | 0.20               | 0.00               | $2.1 \cdot 10^{09}$    | $5.0 \cdot 10^{12}$    |
|              | $\underline{OC}_{20} \leftrightarrow \underline{OC}_{23}$       | 0.11               | 0.01               | $6.9 \cdot 10^{10}$    | $3.4 \cdot 10^{12}$    |
|              | $\underline{OC}_{20} \leftrightarrow \underline{OC}_{24}$ (Ex.) | 0.16               | 0.16               | $9.9 \cdot 10^{09}$    | $9.9 \cdot 10^{09}$    |

**Table VII:** Calculated forward (for) and reversed (rev) activation energies ( $E_a$ ) as well as forward (for) and reversed (rev) room-temperature rate constants ( $k_{@RT}$ ) for the various diffusion pathways on Na(110). For the pre-exponential factor we assumed a value of  $\nu = 5 \cdot 10^{12}$  Hz. All activation energies are reported in eV as well as the reaction rates in Hz. All values have been obtained by means of DFT-PBE.

| System                    | Pathway                                                       | $E_a^{\text{for}}$ | $E_a^{\text{rev}}$ | $k_{@RT}^{\text{for}}$ | $k_{@RT}^{\text{rev}}$ |
|---------------------------|---------------------------------------------------------------|--------------------|--------------------|------------------------|------------------------|
|                           | $\underline{E}_{00} \leftrightarrow \underline{E}_{01}$       | 0.29               | 0.10               | $6.3 \cdot 10^{07}$    | $1.0 \cdot 10^{11}$    |
|                           | $\underline{E}_{00} \leftrightarrow \underline{E}_{01}$ (Ex.) | 0.28               | 0.09               | $9.2 \cdot 10^{07}$    | $1.5 \cdot 10^{11}$    |
|                           | $\underline{E}_{10} \leftrightarrow \underline{E}_{11}$ (Ex.) | 0.31               | 0.04               | $2.9 \cdot 10^{07}$    | $1.1 \cdot 10^{12}$    |
|                           | $\underline{E}_{10} \leftrightarrow \underline{E}_{12}$       | 0.36               | 0.09               | $4.1 \cdot 10^{06}$    | $1.5 \cdot 10^{11}$    |
| Ehrlich-Schwoebel-barrier | $\underline{E}_{10} \leftrightarrow \underline{E}_{12}$ (Ex.) | 0.37               | 0.10               | $2.8 \cdot 10^{06}$    | $1.0 \cdot 10^{11}$    |
|                           | $\underline{E}_{20} \leftrightarrow \underline{E}_{21}$       | 0.35               | 0.09               | $6.1 \cdot 10^{06}$    | $1.5 \cdot 10^{11}$    |
|                           | $\underline{E}_{20} \leftrightarrow \underline{E}_{21}$ (Ex.) | 0.27               | 0.00               | $1.4 \cdot 10^{08}$    | $5.0 \cdot 10^{12}$    |
|                           | $\underline{E}_{20} \leftrightarrow \underline{E}_{22}$ (Ex.) | 0.30               | 0.03               | $4.2 \cdot 10^{07}$    | $1.6 \cdot 10^{12}$    |
|                           | $\underline{E}_{30} \leftrightarrow \underline{E}_{31}$ (Ex.) | 0.19               | 0.08               | $3.1 \cdot 10^{09}$    | $2.2 \cdot 10^{11}$    |



1. G. I. Csonka, J. P. Perdew, A. Ruzsinszky, P. H. T. Philipsen, S. Lebègue, J. Paier, O. A. Vydrov, and J. G. Ángyán, “Assessing the performance of recent density functionals for bulk solids,” *Phys. Rev. B* **79** (15), 354 (2009).
2. D. Gaissmaier, D. Fantauzzi, and T. Jacob, “First principles studies of self-diffusion processes on metallic lithium surfaces,” *The Journal of Chemical Physics* **150** (4), 41723 (2019).
